# Supplementary material for: Dynamic Analysis of Mei-Da Expressway Subgrade Slope: Under Simplified Groundwater Seepage Pressure and Vehicle Load
Source: Research Square preprint supplement (doi:10.21203/rs.3.rs-6642148/v1), 2025-06-06
Supplement: Supplementary file 1 [file 9df38c4969dca215eaceffa9.xlsx]

## Sheet: Fig.4
Ax								Vx								Ux
Time	1	2	3	4	5	6		Time	1	2	3	4	5	6		Time	1	2	3	4	5	6
0.02	9.81348e-06	7.50265e-05	0.000428981	0.00244	0.01351	0.05013		0.02	1.9627e-07	1.50053e-06	8.57961e-06	4.88065e-05	0.000270239	0.001		0.02	1.96274e-06	1.50057e-05	8.57982e-05	0.000488077	0.0027	0.01003
0.04	0.000179084	0.00113	0.00499	0.01995	0.0598	-4.13193e-05		0.04	3.77795e-06	2.40075e-05	0.000108412	0.000447827	0.00147	0.001		0.04	4.17057e-05	0.000270091	0.00126	0.00545	0.02007	0.03007
0.06	0.00145	0.00725	0.02365	0.05833	0.04485	-0.1652		0.06	3.2722e-05	0.000169094	0.00058148	0.00161	0.00236	-0.0023		0.06	0.000406711	0.0022	0.00815	0.02608	0.05837	0.01706
0.08	0.0067	0.02549	0.05464	0.05086	-0.13238	0.03451		0.08	0.000166782	0.000678848	0.00167	0.00263	-0.00028426	-0.00161		0.08	0.0024	0.01068	0.03071	0.06854	0.07916	-0.02208
0.1	0.01898	0.04912	0.0459	-0.08283	-0.17187	0.11555		0.1	0.000546435	0.00166	0.00259	0.000974979	-0.00372	0.000698867		0.1	0.00953	0.03408	0.07338	0.1046	0.0391	-0.03121
0.12	0.03099	0.03518	-0.0585	-0.19095	0.09842	-0.05676		0.12	0.00117	0.00236	0.00142	-0.00284	-0.00175	-0.000436318		0.12	0.02666	0.07434	0.11353	0.08591	-0.01565	-0.02859
0.14	0.01702	-0.05349	-0.16587	-0.04719	0.14082	0.08049		0.14	0.00151	0.0013	-0.0019	-0.00379	0.00106	0.00117		0.14	0.05339	0.11094	0.1088	0.01959	-0.02255	-0.02121
0.16	-0.03774	-0.144	-0.1039	0.13771	-0.0507	-0.04444		0.16	0.000751876	-0.00158	-0.00397	-0.00103	4.9259e-05	0.000284541		0.16	0.07597	0.10804	0.05012	-0.02862	-0.01142	-0.00664
0.18	-0.08579	-0.10332	0.05443	0.07747	0.0087	-0.03242		0.18	-0.000963899	-0.00365	-0.00288	0.000515883	0.000223192	-0.000363836		0.18	0.07385	0.05568	-0.01846	-0.0338	-0.0087	-0.00743
0.2	-0.05628	0.0278	0.09595	-0.01368	0.01961	0.03294		0.2	-0.00209	-0.0031	-0.000965502	0.00024226	0.00061538	0.000294916		0.2	0.04332	-0.01179	-0.05695	-0.02621	-0.000312739	-0.00812
0.22	0.01733	0.07671	0.06519	0.000599216	-0.06165	-0.06193		0.22	-0.00174	-0.00156	0.000338212	0.000254244	-0.000617559	-0.000943714		0.22	0.005	-0.05836	-0.06323	-0.02125	-0.000334441	-0.0146
0.24	0.03161	0.06238	0.04179	-0.01499	0.0049	0.04557		0.24	-0.00111	-0.000313671	0.00117	-4.54835e-05	-0.000519501	-3.23763e-05		0.24	-0.02354	-0.07711	-0.04811	-0.01916	-0.0117	-0.02437
0.26	0.01536	0.08382	-0.03804	-0.02099	-0.01185	-0.05575		0.26	-0.000803328	0.00136	0.000413066	-0.000465292	-0.000756596	-0.00115		0.26	-0.04268	-0.06662	-0.03224	-0.02427	-0.02447	-0.03616
0.28	0.06354	0.03915	-0.04581	-0.02428	-0.01888	0.033		0.28	0.000467462	0.00215	-0.000503175	-0.000950991	-0.00113	-0.000487489		0.28	-0.04603	-0.03154	-0.03314	-0.03843	-0.04337	-0.05251
0.3	0.08382	-0.06629	0.03842	-0.00227	0.01966	0.00851		0.3	0.00214	0.000819772	0.000265223	-0.000996413	-0.000740981	-0.000317361		0.3	-0.01992	-0.00188	-0.03552	-0.05791	-0.06212	-0.06056
0.32	-0.02538	-0.05123	-0.00892	0.05579	0.02205	0.02547		0.32	0.00164	-0.000204816	8.67621e-05	0.000119327	-0.000299942	0.000192017		0.32	0.01788	0.00427	-0.032	-0.06668	-0.07253	-0.06181
0.34	-0.10483	-0.01097	-0.04971	-0.00599	0.04328	0.02988		0.34	-0.000460399	-0.000424217	-0.000907344	-4.10105e-07	0.000565677	0.000789672		0.34	0.02964	-0.00202	-0.0402	-0.06549	-0.06988	-0.052
0.36	-0.04403	-0.05601	0.01506	-0.00999	0.01731	-0.0261		0.36	-0.00134	-0.00154	-0.000606059	-0.000200129	0.0009118	0.000267585		0.36	0.01162	-0.02171	-0.05534	-0.06749	-0.0551	-0.04142
0.38	0.01347	-0.0168	-0.0114	0.04074	-0.00128	0.02514		0.38	-0.00107	-0.00188	-0.000834022	0.000614577	0.000886172	0.000770443		0.38	-0.0125	-0.05596	-0.06974	-0.06335	-0.03712	-0.03105
0.4	0.00864	0.06941	0.00846	-0.01847	-0.02316	-0.05129		0.4	-0.000898974	-0.000492309	-0.000664833	0.000245255	0.000422894	-0.000255278		0.4	-0.03221	-0.07968	-0.08473	-0.05475	-0.02403	-0.02589
0.42	0.02017	0.05202	0.09075	0.01936	-0.02071	0.00928		0.42	-0.000495543	0.000548103	0.00115	0.000632427	8.6523e-06	-6.96993e-05		0.42	-0.04616	-0.07913	-0.07987	-0.04597	-0.01972	-0.02914
0.44	0.04191	0.02482	0.02623	0.01585	-0.01199	-0.04935		0.44	0.000342616	0.00104	0.00167	0.000949525	-0.000231164	-0.00106		0.44	-0.04769	-0.0632	-0.05162	-0.03015	-0.02194	-0.04041
0.46	0.03606	0.02477	-0.02746	-0.04064	-0.0057	0.0309		0.46	0.00106	0.00154	0.00113	0.000136718	-0.000345182	-0.000438561		0.46	-0.03362	-0.03736	-0.02361	-0.01929	-0.0277	-0.05536
0.48	0.0032	0.00433	-0.01506	0.00102	0.00276	0.00624		0.48	0.00113	0.00163	0.000824487	0.000157133	-0.000290021	-0.000313789		0.48	-0.01171	-0.00569	-0.00411	-0.01635	-0.03406	-0.06288
0.5	-0.01725	-0.03099	-0.0298	-0.02803	-0.02006	0.02484		0.5	0.000782785	0.00101	0.000228485	-0.000403388	-0.000691251	0.00018307		0.5	0.0074	0.02064	0.00642	-0.01882	-0.04387	-0.06419
0.52	-0.004	-0.06136	-0.03311	-0.00849	0.02355	0.00516		0.52	0.000702794	-0.000220621	-0.000433632	-0.000573089	-0.00022035	0.000286246		0.52	0.02226	0.0285	0.00437	-0.02858	-0.05298	-0.0595
0.54	-0.02829	-0.03758	-0.04159	-0.00346	0.01522	-0.00388		0.54	0.000136938	-0.000972136	-0.00127	-0.000642325	8.41236e-05	0.000208644		0.54	0.03065	0.01657	-0.01263	-0.04073	-0.05435	-0.05455
0.56	-0.05527	-0.01633	-0.01287	-0.02349	0.00403	0.01522		0.56	-0.000968481	-0.0013	-0.00152	-0.00111	0.00016472	0.000513018		0.56	0.02234	-0.00614	-0.04051	-0.05828	-0.05186	-0.04733
0.58	-0.00385	-0.01413	0.03122	0.05556	0.00237	-0.02091		0.58	-0.00105	-0.00158	-0.000898534	-9.74563e-07	0.00021216	9.47399e-05		0.58	0.0022	-0.03494	-0.06472	-0.06941	-0.04809	-0.04125
0.6	0.01469	0.02647	0.02041	0.01787	0.00314	0.00571		0.6	-0.000751702	-0.00105	-0.000490359	0.00035649	0.000274953	0.000209004		0.6	-0.01578	-0.06128	-0.07861	-0.06586	-0.04322	-0.03822
0.62	-0.00396	0.03297	0.02341	-0.00507	0.00847	-0.04738		0.62	-0.000830851	-0.000392763	-2.22374e-05	0.000255077	0.000444303	-0.000738528		0.62	-0.0316	-0.07572	-0.08374	-0.05974	-0.03603	-0.04351
0.64	0.0343	0.04111	0.05032	0.02183	-0.03249	0.02224		0.64	-0.000144858	0.000429343	0.000984104	0.000691726	-0.000205554	-0.000293714		0.64	-0.04136	-0.07536	-0.07412	-0.05027	-0.03364	-0.05383
0.66	0.03802	0.0546	0.03288	-0.0014	0.00245	-0.01693		0.66	0.000615572	0.00152	0.00164	0.000663709	-0.000156622	-0.000632245		0.66	-0.03665	-0.05585	-0.04786	-0.03672	-0.03726	-0.06309
0.68	0.00643	0.00225	-0.02405	-0.00573	-0.00674	0.02205		0.68	0.000744163	0.00157	0.00116	0.000549037	-0.00029134	-0.000191194		0.68	-0.02305	-0.02497	-0.01984	-0.02459	-0.04174	-0.07133
0.7	0.01398	-0.01197	-0.02481	-0.03243	-0.000167946	-0.00536		0.7	0.00102	0.00133	0.000664295	-9.9659e-05	-0.000294699	-0.000298465		0.7	-0.00537	0.00396	-0.00159	-0.0201	-0.0476	-0.07622
0.72	-0.00134	-0.02871	-0.02174	-0.01406	-0.000246363	0.02686		0.72	0.000996955	0.000752794	0.000229413	-0.000380883	-0.000299627	0.00023873		0.72	0.01483	0.02476	0.00734	-0.0249	-0.05354	-0.07682
0.74	-0.03159	-0.05805	-0.05013	-0.00454	0.00686	0.00712		0.74	0.000365062	-0.000408212	-0.000773257	-0.000471672	-0.000162522	0.000381203		0.74	0.02845	0.02821	0.00191	-0.03343	-0.05816	-0.07062
0.76	-0.02903	-0.02467	-0.02218	-0.01793	0.01951	0.00934		0.76	-0.000215473	-0.000901614	-0.00122	-0.000830248	0.000227763	0.000567911		0.76	0.02995	0.01511	-0.018	-0.04645	-0.05751	-0.06113
0.78	-0.02388	-0.02886	-0.00569	0.0125	-0.01092	-0.00352		0.78	-0.000693079	-0.00148	-0.00133	-0.000580281	9.43214e-06	0.000497504		0.78	0.02086	-0.0087	-0.04347	-0.06055	-0.05514	-0.05048
0.8	-0.01902	-0.0089	0.01249	0.02097	0.0199	-0.02395		0.8	-0.00107	-0.00166	-0.00108	-0.000160934	0.000407375	1.85689e-05		0.8	0.0032	-0.04005	-0.06759	-0.06796	-0.05097	-0.04531
0.82	0.00409	0.04094	0.03391	0.01421	-0.00373	0.0052		0.82	-0.00099163	-0.000837929	-0.000402619	0.000123291	0.000332836	0.000122618		0.82	-0.01745	-0.065	-0.08242	-0.06834	-0.04357	-0.0439
0.84	0.02209	0.03139	0.03521	0.01719	-0.00785	-0.02834		0.84	-0.000549872	-0.000210169	0.000301599	0.000467037	0.000175887	-0.000444101		0.84	-0.03287	-0.07548	-0.08343	-0.06244	-0.03848	-0.04712
0.86	0.02289	0.04328	0.04335	0.01809	-0.01039	0.00426		0.86	-9.21682e-05	0.000655474	0.00117	0.000828743	-3.18572e-05	-0.000358982		0.86	-0.03929	-0.07103	-0.06873	-0.04948	-0.03704	-0.05515
0.88	0.03094	0.03758	0.00386	-0.00832	-0.0025	-0.01224		0.88	0.000526588	0.00141	0.00125	0.0006624	-8.17811e-05	-0.000603716		0.88	-0.03494	-0.0504	-0.04458	-0.03457	-0.03818	-0.06478
0.9	0.02059	0.00384	-0.000762037	-0.01884	-0.01173	0.02011		0.9	0.000938326	0.00148	0.00123	0.00028567	-0.000316384	-0.000201454		0.9	-0.0203	-0.02149	-0.01982	-0.02509	-0.04216	-0.07283
0.92	-0.000575576	-0.01044	-0.0207	-0.01112	-0.00458	-0.00010782		0.92	0.000926815	0.00127	0.000816656	6.33288e-05	-0.000408012	-0.00020361		0.92	-0.00164	0.00609	0.000651764	-0.0216	-0.0494	-0.07688
0.94	-0.00257	-0.03709	-0.05233	-0.02253	0.01447	0.02713		0.94	0.000875413	0.000533189	-0.000229859	-0.000387195	-0.000118564	0.000338999		0.94	0.01638	0.02417	0.00652	-0.02484	-0.05467	-0.07552
0.96	-0.02837	-0.04463	-0.02092	-0.01828	-0.00279	0.00372		0.96	0.000308008	-0.000359437	-0.000648274	-0.000752731	-0.000174463	0.000413327		0.96	0.02821	0.02591	-0.00226	-0.03624	-0.0576	-0.068
0.98	-0.03372	-0.03672	-0.0338	0.00463	0.01688	0.00734		0.98	-0.000366409	-0.00109	-0.00132	-0.00066016	0.000163066	0.000560173		0.98	0.02763	0.01138	-0.02199	-0.05036	-0.05771	-0.05827
1	-0.01541	-0.0228	-0.00315	0.00833	0.00173	-0.00886		1	-0.000674517	-0.00155	-0.00139	-0.000493471	0.000197721	0.000382972		1	0.01722	-0.01506	-0.0491	-0.0619	-0.05411	-0.04883

## Sheet: Fig.5
Ay								Vy								Uy
Time	1	2	3	4	5	6		Time	1	2	3	4	5	6		Time	1	2	3	4	5	6
0.02	-3.31202e-06	-2.2533e-05	-0.000132201	-0.000772781	-0.00474	-0.04512		0.02	-6.62404e-08	-4.5066e-07	-2.64402e-06	-1.54556e-05	-9.48365e-05	-0.000902396		0.02	-6.6242e-07	-4.50671e-06	-2.64408e-05	-0.00015456	-0.000948389	-0.00902
0.04	-6.34681e-05	-0.00034786	-0.00158	-0.00661	-0.02553	-0.13402		0.04	-1.3356e-06	-7.40785e-06	-3.4298e-05	-0.000147587	-0.000605364	-0.00358		0.04	-1.46811e-05	-8.30933e-05	-0.000395867	-0.00179	-0.00795	-0.05388
0.06	-0.000545993	-0.00233	-0.00782	-0.02136	-0.04891	-0.09432		0.06	-1.22555e-05	-5.40507e-05	-0.000190708	-0.000574846	-0.00158	-0.00547		0.06	-0.000150594	-0.000697687	-0.00265	-0.00901	-0.02984	-0.1444
0.08	-0.00275	-0.00871	-0.01963	-0.02953	-0.04779	0.05411		0.08	-6.73172e-05	-0.000228246	-0.000583387	-0.00117	-0.00254	-0.00439		0.08	-0.000946329	-0.00352	-0.01039	-0.02641	-0.07107	-0.24296
0.1	-0.00885	-0.01896	-0.02304	-0.01296	-0.05275	0.07467		0.1	-0.000244402	-0.000607492	-0.00104	-0.00142	-0.00359	-0.00289		0.1	-0.00406	-0.01188	-0.02666	-0.05231	-0.1324	-0.31576
0.12	-0.01821	-0.02136	-0.00315	-0.01703	-0.03642	0.03034		0.12	-0.000608518	-0.00103	-0.00111	-0.00177	-0.00432	-0.00229		0.12	-0.01259	-0.0283	-0.04818	-0.08421	-0.21157	-0.36756
0.14	-0.02126	-0.00299	0.00688	-0.07603	0.06685	0.04209		0.14	-0.00103	-0.00109	-0.000969555	-0.00329	-0.00299	-0.00144		0.14	-0.02902	-0.04959	-0.06894	-0.13472	-0.28465	-0.40487
0.16	-0.00451	0.01724	-0.04343	-0.0635	0.07542	0.00219		0.16	-0.00112	-0.000749618	-0.00184	-0.00456	-0.00148	-0.0014		0.16	-0.05059	-0.06803	-0.09702	-0.21314	-0.32928	-0.43333
0.18	0.02582	-0.00215	-0.09013	0.07389	-0.02676	-0.04275		0.18	-0.000607608	-0.000792681	-0.00364	-0.00308	-0.00201	-0.00226		0.18	-0.06791	-0.08345	-0.15181	-0.28948	-0.36417	-0.4699
0.2	0.03434	-0.04712	-0.01244	0.11103	0.01842	-0.02368		0.2	7.9277e-05	-0.00174	-0.00389	-0.000857415	-0.00164	-0.00273		0.2	-0.07319	-0.10873	-0.22711	-0.32883	-0.40074	-0.51975
0.22	-0.00148	-0.04383	0.11234	0.00692	0.02933	-0.0025		0.22	4.95945e-05	-0.00261	-0.00164	-0.00071903	-0.00106	-0.00278		0.22	-0.0719	-0.1522	-0.28243	-0.3446	-0.42775	-0.57484
0.24	-0.04782	0.0183	0.09284	-0.01224	-0.04381	0.04891		0.24	-0.000906729	-0.00225	0.000213977	-0.000963791	-0.00193	-0.0018		0.24	-0.08048	-0.20077	-0.29672	-0.36142	-0.45766	-0.62065
0.26	-0.04864	0.0649	-0.02575	-0.00198	0.01211	0.02851		0.26	-0.00188	-0.000947801	-0.000301025	-0.001	-0.00169	-0.00123		0.26	-0.10834	-0.23271	-0.29759	-0.3811	-0.4939	-0.65097
0.28	0.00413	0.05406	-0.05045	-0.05176	-0.00926	-0.0038		0.28	-0.0018	0.000133358	-0.00131	-0.00204	-0.00188	-0.00131		0.28	-0.1451	-0.24085	-0.3137	-0.41151	-0.52958	-0.67635
0.3	0.05635	-0.00158	0.01114	0.00177	-0.00723	0.02207		0.3	-0.000670053	0.00010179	-0.00109	-0.002	-0.00202	-0.000865661		0.3	-0.16977	-0.2385	-0.33768	-0.45193	-0.56856	-0.69808
0.32	0.04274	-0.05169	0.01636	0.07168	0.08021	0.04579		0.32	0.000184723	-0.00093205	-0.000760007	-0.000569513	-0.000416988	5.00558e-05		0.32	-0.17463	-0.24681	-0.35615	-0.47765	-0.59294	-0.70624
0.34	-0.0212	-0.02047	-0.01469	0.01192	0.02772	0.04667		0.34	-0.000239258	-0.00134	-0.00105	-0.000331021	0.000137353	0.000983548		0.34	-0.17517	-0.26954	-0.37429	-0.48666	-0.59574	-0.6959
0.36	-0.02933	0.0454	0.02759	0.00465	0.03155	-0.01176		0.36	-0.000825878	-0.000433444	-0.00050198	-0.000238115	0.000768269	0.000748356		0.36	-0.18582	-0.28729	-0.38984	-0.49235	-0.58668	-0.67858
0.38	0.03371	0.0289	0.04858	0.05844	0.03591	-0.00967		0.38	-0.00015163	0.000144578	0.000469662	0.000930589	0.00149	0.000555		0.38	-0.1956	-0.29018	-0.39017	-0.48543	-0.56413	-0.66555
0.4	0.03739	-0.00843	-0.02163	0.00655	-0.01587	-0.00681		0.4	0.000596102	-2.40763e-05	3.69954e-05	0.00106	0.00117	0.000418782		0.4	-0.19115	-0.28897	-0.3851	-0.4655	-0.53757	-0.65581
0.42	-0.02863	0.00572	-0.00261	-0.03135	-0.02766	-0.02377		0.42	2.35225e-05	9.02593e-05	-1.52008e-05	0.000434526	0.000616027	-5.66411e-05		0.42	-0.18496	-0.28831	-0.38488	-0.45054	-0.51972	-0.65219
0.44	-0.02616	4.35677e-05	0.05639	0.00882	-0.05475	-0.04146		0.44	-0.000499773	9.11307e-05	0.00111	0.000610928	-0.000479017	-0.000885931		0.44	-0.18972	-0.2865	-0.37391	-0.44009	-0.51835	-0.66161
0.46	0.02443	0.00122	-0.01005	-0.00708	-0.000676167	-0.00502		0.46	-1.12184e-05	0.000115484	0.000911638	0.000469271	-0.00049254	-0.00098641		0.46	-0.19483	-0.28443	-0.35367	-0.42929	-0.52807	-0.68034
0.48	0.0092	0.03203	-0.03138	-0.02584	1.94967e-05	0.02044		0.48	0.000172704	0.000756061	0.000284117	-4.76069e-05	-0.00049215	-0.000577599		0.48	-0.19321	-0.27572	-0.34171	-0.42507	-0.53791	-0.69598
0.5	-0.01692	-0.00497	0.00194	-0.01331	-0.01339	0.02265		0.5	-0.000165716	0.000656681	0.000322906	-0.000313732	-0.000759974	-0.000124698		0.5	-0.19315	-0.26159	-0.33564	-0.42868	-0.55043	-0.703
0.52	0.01294	-0.03825	-0.0281	-0.0088	0.03783	0.04336		0.52	9.30594e-05	-0.000108236	-0.000239099	-0.000489779	-3.30647e-06	0.000742561		0.52	-0.19387	-0.2561	-0.3348	-0.43672	-0.55807	-0.69682
0.54	0.02195	0.00864	-0.00449	0.01442	0.01472	0.03572		0.54	0.000531984	6.46187e-05	-0.00032883	-0.000201314	0.000291023	0.00146		0.54	-0.18762	-0.25654	-0.34048	-0.44363	-0.55519	-0.67483
0.56	-0.01423	0.00628	0.01301	0.00641	0.02302	0.00599		0.56	0.000247318	0.000190216	-6.86423e-05	-7.30482e-05	0.00075152	0.00158		0.56	-0.17983	-0.25399	-0.34445	-0.44637	-0.54476	-0.64449
0.58	-0.01117	-0.02605	-0.01753	0.01509	0.02465	-0.02131		0.58	2.39277e-05	-0.000330818	-0.00041926	0.000228811	0.00124	0.00115		0.58	-0.17712	-0.2554	-0.34933	-0.44481	-0.5248	-0.61722
0.6	0.01797	0.01138	0.01667	0.02667	-0.00486	-0.01612		0.6	0.000383262	-0.000103231	-8.59352e-05	0.000762191	0.00115	0.000828177		0.6	-0.17304	-0.25974	-0.35439	-0.4349	-0.50089	-0.59743
0.62	-0.00561	0.01622	0.02728	-0.00101	-0.02344	-0.06008		0.62	0.000271146	0.00022124	0.000459575	0.00074201	0.000678432	-0.000373505		0.62	-0.1665	-0.25856	-0.35065	-0.41986	-0.48263	-0.59288
0.64	-0.02135	-0.01343	0.00817	0.00664	-0.02469	-0.02624		0.64	-0.000155923	-4.7289e-05	0.000622986	0.000874834	0.000184615	-0.000898351		0.64	-0.16535	-0.25682	-0.33982	-0.40369	-0.474	-0.6056
0.66	0.00936	0.01713	0.0086	-0.02263	-0.02522	-0.01079		0.66	3.13413e-05	0.000295229	0.000794944	0.000422316	-0.000319797	-0.00111		0.66	-0.16659	-0.25434	-0.32564	-0.39072	-0.47535	-0.62573
0.68	-0.00086658	0.01601	-0.01177	-0.01861	-0.03511	-0.00541		0.68	1.40097e-05	0.000615442	0.000559516	5.01072e-05	-0.00102	-0.00122		0.68	-0.16614	-0.24523	-0.3121	-0.386	-0.48877	-0.64909
0.7	-0.01139	-0.01582	-0.00912	-0.0048	0.01428	0.02198		0.7	-0.00021383	0.000298956	0.000377125	-4.58628e-05	-0.000736463	-0.000782676		0.7	-0.16814	-0.23609	-0.30273	-0.38596	-0.50636	-0.66914
0.72	0.01733	0.0013	-0.01429	-0.03811	0.00807	0.04702		0.72	0.000132688	0.000324871	9.13274e-05	-0.000808157	-0.000575102	0.000157662		0.72	-0.16895	-0.22985	-0.29805	-0.3945	-0.51947	-0.67539
0.74	0.00121	-0.01282	-0.0295	0.01341	0.00874	0.02815		0.74	0.000156957	6.85085e-05	-0.000498622	-0.000540028	-0.000400285	0.000720629		0.74	-0.16605	-0.22592	-0.30212	-0.40798	-0.52923	-0.66661
0.76	-0.0077	-0.02051	-0.00595	0.00818	0.03759	0.02312		0.76	2.95657e-06	-0.000341756	-0.000617552	-0.000376452	0.000351426	0.00118		0.76	-0.16445	-0.22865	-0.31328	-0.41714	-0.52972	-0.64757
0.78	0.01231	0.00848	0.000731612	-0.0019	0.01395	0.01131		0.78	0.000249084	-0.000172098	-0.00060292	-0.000414369	0.000630508	0.00141		0.78	-0.16193	-0.23379	-0.32549	-0.42505	-0.5199	-0.62165
0.8	-0.00775	-0.00913	0.00917	0.03152	0.01251	-0.03456		0.8	9.41238e-05	-0.000354772	-0.000419589	0.000215958	0.000880733	0.000718126		0.8	-0.1585	-0.23906	-0.33571	-0.42703	-0.50478	-0.60037
0.82	-0.00464	0.000675702	0.01909	0.00834	-0.00547	-0.01571		0.82	1.33559e-06	-0.000341258	-3.77297e-05	0.000382686	0.000771431	0.000403846		0.82	-0.15755	-0.24602	-0.34029	-0.42105	-0.48826	-0.58915
0.84	0.00422	0.01759	0.00948	0.01294	-0.02002	-0.04625		0.84	8.57674e-05	1.05038e-05	0.000151877	0.000641578	0.000371042	-0.000521079		0.84	-0.15668	-0.24932	-0.33915	-0.41081	-0.47684	-0.59033
0.86	-0.01475	-0.00143	0.01816	-0.0044	-0.02151	-0.03223		0.86	-0.000209208	-1.80835e-05	0.000515051	0.000553651	-5.91277e-05	-0.00117		0.86	-0.15791	-0.2494	-0.33248	-0.39885	-0.47372	-0.60719
0.88	0.0054	0.01387	0.00545	-0.01147	-0.02212	-0.0074		0.88	-0.000101222	0.000259378	0.000624055	0.000324246	-0.000501555	-0.00131		0.88	-0.16101	-0.24699	-0.32108	-0.39007	-0.47933	-0.63199
0.9	0.00257	0.00352	-0.00799	-0.01418	-0.01889	0.00834		0.9	-4.98146e-05	0.000329877	0.000464166	4.06631e-05	-0.000879301	-0.00115		0.9	-0.16252	-0.24109	-0.3102	-0.38643	-0.49313	-0.65659
0.92	-0.01183	-0.00559	-0.00935	-0.02269	0.000324942	0.02579		0.92	-0.000286511	0.000218142	0.000277262	-0.000413054	-0.000872802	-0.000631118		0.92	-0.16589	-0.23561	-0.30279	-0.39015	-0.51065	-0.67437
0.94	0.01701	0.00219	-0.02402	-0.00676	0.01204	0.04699		0.94	5.35994e-05	0.000261877	-0.000203116	-0.00054816	-0.000631975	0.000308747		0.94	-0.16822	-0.23081	-0.30205	-0.39976	-0.5257	-0.6776
0.96	0.00261	-0.01975	-0.01052	-0.00878	0.01965	0.02173		0.96	0.000105837	-0.000133186	-0.000413426	-0.000723785	-0.000238905	0.000743251		0.96	-0.16662	-0.22953	-0.30821	-0.41248	-0.53441	-0.66708
0.98	-0.00669	-0.00216	-0.01044	0.01232	0.03393	0.0242		0.98	-2.79444e-05	-0.000176445	-0.00062215	-0.000477437	0.000439744	0.00123		0.98	-0.16584	-0.23262	-0.31857	-0.42449	-0.5324	-0.64737
1	0.01314	-0.00367	-0.00197	0.01466	0.00784	0.00572		1	0.000234893	-0.00024979	-0.000661575	-0.000184256	0.000596492	0.00134		1	-0.16377	-0.23689	-0.33141	-0.43111	-0.52204	-0.62168

## Sheet: Fig.6
Ax	7.875	9	10.5
1	0.078872	0.0901394	0.105163
2	0.09535	0.108971	0.127133
3	0.119218	0.136249	0.158957
4	0.144715	0.165388	0.192953
5	0.128866	0.147276	0.171822
6	0.123381	0.141007	0.164508
Ay
1	0.0433668	0.049562	0.0578224
2	0.0462191	0.0528219	0.0616255
3	0.0834505	0.095372	0.111267
4	0.0800672	0.0915054	0.106756
5	0.0548215	0.0626531	0.0730953
6	0.100339	0.114673	0.133785
Vx
1	0.00154338	0.00176386	0.00205783
2	0.00238809	0.00272925	0.00318412
3	0.0027372	0.00312823	0.0036496
4	0.00286064	0.00326931	0.00381419
5	0.00275606	0.00314978	0.00367475
6	0.00171415	0.00195902	0.00228553
Vy
1	0.00152855	0.00174691	0.00203807
2	0.00190664	0.00217902	0.00254219
3	0.00296477	0.00338831	0.00395303
4	0.00339668	0.00388192	0.00452891
5	0.0031657	0.00361794	0.00422093
6	0.00407954	0.00466233	0.00543938
Ux
1	5.92158e-05	6.76752e-05	7.89544e-05
2	8.18998e-05	9.35997e-05	0.0001092
3	8.32967e-05	9.51962e-05	0.000111062
4	7.85635e-05	8.97868e-05	0.000104751
5	6.00227e-05	6.85974e-05	8.00303e-05
6	5.34058e-05	6.10352e-05	7.12078e-05
Uy
1	0.000147813	0.000168929	0.000197084
2	0.000220255	0.00025172	0.000293673
3	0.000295582	0.000337808	0.000394109
4	0.000371485	0.000424555	0.000495314
5	0.000446647	0.000510454	0.000595529
6	0.000524049	0.000598913	0.000698732
Ux
1	0.0592158	0.0676752	0.0789544
2	0.0818998	0.0935997	0.1092
3	0.0832967	0.0951962	0.111062
4	0.0785635	0.0897868	0.104751
5	0.0600227	0.0685974	0.0800303
6	0.0534058	0.0610352	0.0712078
Uy
1	0.147813	0.168929	0.197084
2	0.220255	0.25172	0.293673
3	0.295582	0.337808	0.394109
4	0.371485	0.424555	0.495314
5	0.446647	0.510454	0.595529
6	0.524049	0.598913	0.698732

## Sheet: Fig.7
Ax	No Sliding surface	10°	20°	30°
1	0.104832	0.105163	0.102278	0.108299
2	0.143998	0.127133	0.126888	0.138373
3	0.16587	0.158957	0.146202	0.153257
4	0.190946	0.192953	0.179547	0.180499
5	0.171867	0.171822	0.1759	0.173559
6	0.165197	0.164508	0.16045	0.162877
Ay
1	0.0563473	0.0578224	0.0622992	0.069409
2	0.0648988	0.0616255	0.0726137	0.0841536
3	0.112336	0.111267	0.0934878	0.122837
4	0.111028	0.106756	0.11468	0.11933
5	0.0802052	0.0730953	0.0861047	0.0865014
6	0.134023	0.133785	0.132109	0.124341
Vx
1	0.00214383	0.00205783	0.00215836	0.00241966
2	0.0036514	0.00318412	0.00343431	0.00375692
3	0.00397306	0.0036496	0.00348773	0.00395709
4	0.00378774	0.00381419	0.00342443	0.00407683
5	0.0037216	0.00367475	0.00380204	0.00338188
6	0.00230221	0.00228553	0.00218955	0.00235493
Vy
1	0.0018795	0.00203807	0.00205517	0.00215717
2	0.00261171	0.00254219	0.00252802	0.00281258
3	0.00388951	0.00395303	0.00379633	0.00404558
4	0.00455579	0.00452891	0.00470479	0.00445141
5	0.00432262	0.00422093	0.00424258	0.00458078
6	0.00546917	0.00543938	0.00534533	0.00512929
Ux
1	7.59745e-05	7.89544e-05	7.93502e-05	8.14655e-05
2	0.000110942	0.0001092	0.000112508	0.000118345
3	0.000113528	0.000111062	0.000108783	0.000117488
4	0.0001046	0.000104751	0.000101496	0.00010178
5	7.91557e-05	8.00303e-05	7.99876e-05	7.83966e-05
6	7.68783e-05	7.12078e-05	7.32948e-05	7.91533e-05
Uy
1	0.000195598	0.000197084	0.000197099	0.000198499
2	0.000290178	0.000293673	0.000291992	0.000294858
3	0.000390167	0.000394109	0.000393518	0.000395679
4	0.000492349	0.000495314	0.000495756	0.000497568
5	0.000595736	0.000595529	0.000595558	0.000600207
6	0.000706235	0.000698732	0.000702407	0.000706054
Ux
1	0.0759745	0.0789544	0.0793502	0.0814655
2	0.110942	0.1092	0.112508	0.118345
3	0.113528	0.111062	0.108783	0.117488
4	0.1046	0.104751	0.101496	0.10178
5	0.0791557	0.0800303	0.0799876	0.0783966
6	0.0768783	0.0712078	0.0732948	0.0791533
Uy
1	0.195598	0.197084	0.197099	0.198499
2	0.290178	0.293673	0.291992	0.294858
3	0.390167	0.394109	0.393518	0.395679
4	0.492349	0.495314	0.495756	0.497568
5	0.595736	0.595529	0.595558	0.600207
6	0.706235	0.698732	0.702407	0.706054

## Sheet: Fig.8
Ax	No Sliding surface	H=4	H=8	H=12	H=16	H=20
S1	0.104832	0.0930006	0.0991529	0.0972888	0.0920191	0.105163	0.887139	0.945827	0.928045	0.877777	1.00316	0.0131439
S2	0.143998	0.134843	0.136967	0.134826	0.135185	0.127133	0.936423	0.951173	0.936305	0.938798	0.88288	0.016865
S3	0.16587	0.155165	0.155374	0.155881	0.141357	0.158957	0.935462	0.936722	0.939778	0.852216	0.958323	0.024513
S4	0.190946	0.182386	0.189699	0.162551	0.185527	0.192953	0.955171	0.993469	0.851293	0.97162	1.01051	0.030402
S5	0.171867	0.21379	0.142771	0.1722	0.176848	0.171822	1.24393	0.830706	1.00194	1.02898	0.999738	0.071019
S6	0.165197	0.166424	0.163457	0.162293	0.163341	0.164508	1.00743	0.989467	0.982421	0.988765	0.995829	0.004131
Ay
1	0.0563473	0.0480968	0.0499366	0.0573995	0.061038	0.0578224						0.0129412
2	0.0648988	0.0570062	0.064569	0.0733863	0.0730671	0.0616255						0.0163801
3	0.112336	0.0995494	0.111881	0.124755	0.0958971	0.111267						0.0288579
4	0.111028	0.117053	0.133979	0.0999013	0.114447	0.106756						0.0340777
5	0.0802052	0.0956195	0.0785593	0.0925707	0.0710738	0.0730953						0.0245457
6	0.134023	0.121717	0.125274	0.131245	0.13314	0.133785						0.012306
Vx
1	0.00214383	0.00196958	0.00202374	0.00201988	0.00197313	0.00205783						0.00017425
2	0.0036514	0.00342429	0.0034869	0.0034735	0.00364237	0.00318412						0.00046728
3	0.00397306	0.00375894	0.00383784	0.00407061	0.00334896	0.0036496						0.00072165
4	0.00378774	0.00386209	0.00446001	0.00323459	0.00348446	0.00381419						0.00122542
5	0.0037216	0.00340191	0.00306515	0.0038008	0.00377744	0.00367475						0.00073565
6	0.00230221	0.00238729	0.00223021	0.00220717	0.00225368	0.00228553						0.00018012
Vy
1	0.0018795	0.00182969	0.0018689	0.00201771	0.00204645	0.00203807						0.00021676
2	0.00261171	0.00245209	0.00241808	0.00259529	0.00261802	0.00254219						0.00019994
3	0.00388951	0.00391164	0.00395795	0.00419495	0.00392014	0.00395303						0.00030544
4	0.00455579	0.00435091	0.00450402	0.00454523	0.00463981	0.00452891						0.0002889
5	0.00432262	0.00428477	0.00443942	0.0043179	0.0042186	0.00422093						0.00022082
6	0.00546917	0.00505119	0.00507847	0.00526541	0.00538135	0.00543938						0.00041798
Ux
1	7.59745e-05	7.56814e-05	7.54548e-05	7.59264e-05	7.67259e-05	7.89544e-05						3.4996e-06
2	0.000110942	0.000110831	0.000110881	0.000112583	0.000117832	0.0001092						8.632e-06
3	0.000113528	0.000112379	0.000113926	0.000121242	0.000109224	0.000111062						1.2018e-05
4	0.0001046	0.000101885	0.000103911	9.90442e-05	0.000102552	0.000104751						5.7068e-06
5	7.91557e-05	8.33005e-05	7.47232e-05	7.8614e-05	8.05317e-05	8.00303e-05						8.5773e-06
6	7.68783e-05	8.00135e-05	7.41736e-05	7.24381e-05	7.22388e-05	7.12078e-05						8.8057e-06
Uy
1	0.000195598	0.000195084	0.000195774	0.00019671	0.000196773	0.000197084						2e-06
2	0.000290178	0.000293561	0.000291393	0.000292894	0.000294859	0.000293673						4.681e-06
3	0.000390167	0.000394727	0.000394193	0.000396015	0.000393764	0.000394109						5.848e-06
4	0.000492349	0.000493454	0.000491909	0.000496315	0.000496305	0.000495314						4.406e-06
5	0.000595736	0.000601944	0.000598712	0.000595575	0.000598586	0.000595529						6.415e-06
6	0.000706235	0.000712882	0.000706537	0.000707585	0.000702341	0.000698732						1.415e-05
Ux
1	0.0759745	0.0756814	0.0754548	0.0759264	0.0767259	0.0789544	0.996142	0.99316	0.999367	1.00989	1.03922	0.0034996
2	0.110942	0.110831	0.110881	0.112583	0.117832	0.1092	0.998999	0.99945	1.01479	1.0621	0.984298	0.008632
3	0.113528	0.112379	0.113926	0.121242	0.109224	0.111062	0.989879	1.00351	1.06795	0.962089	0.978278	0.012018
4	0.1046	0.101885	0.103911	0.0990442	0.102552	0.104751	0.974044	0.993413	0.946885	0.980421	1.00144	0.0057068
5	0.0791557	0.0833005	0.0747232	0.078614	0.0805317	0.0800303	1.05236	0.944003	0.993157	1.01738	1.01105	0.0085773
6	0.0768783	0.0800135	0.0741736	0.0724381	0.0722388	0.0712078	1.04078	0.964818	0.942244	0.939651	0.926241	0.0088057
Uy
1	0.195598	0.195084	0.195774	0.19671	0.196773	0.197084	0.997372	1.0009	1.00569	1.00601	1.0076	0.002
2	0.290178	0.293561	0.291393	0.292894	0.294859	0.293673	1.01166	1.00419	1.00936	1.01613	1.01204	0.004681
3	0.390167	0.394727	0.394193	0.396015	0.393764	0.394109	1.01169	1.01032	1.01499	1.00922	1.0101	0.005848
4	0.492349	0.493454	0.491909	0.496315	0.496305	0.495314	1.00224	0.999106	1.00806	1.00803	1.00602	0.004406
5	0.595736	0.601944	0.598712	0.595575	0.598586	0.595529	1.01042	1.005	0.99973	1.00478	0.999653	0.006415
6	0.706235	0.712882	0.706537	0.707585	0.702341	0.698732	1.00941	1.00043	1.00191	0.994486	0.989376	0.01415
							0.996142	0.998999	0.989879	0.974044	1.05236	1.04078
							0.99316	0.99945	1.00351	0.993413	0.944003	0.964818
							0.999367	1.01479	1.06795	0.946885	0.993157	0.942244
							1.00989	1.0621	0.962089	0.980421	1.01738	0.939651
							1.03922	0.984298	0.978278	1.00144	1.01105	0.926241
							0.997372	1.01166	1.01169	1.00224	1.01042	1.00941
							1.0009	1.00419	1.01032	0.999106	1.005	1.00043
							1.00569	1.00936	1.01499	1.00806	0.99973	1.00191
							1.00601	1.01613	1.00922	1.00803	1.00478	0.994486
							1.0076	1.01204	1.0101	1.00602	0.999653	0.989376

## Sheet: Fig.9
Ux	1	2	3	4	5	6
H=4	0.99614	0.999	0.98988	0.97404	1.05236	1.04078
H=8	0.99316	0.99945	1.00351	0.99341	0.944	0.96482
H=12	0.99937	1.01479	1.06795	0.94689	0.99316	0.94224
H=16	1.00989	1.0621	0.96209	0.98042	1.01738	0.93965
H=20	1.03922	0.9843	0.97828	1.00144	1.01105	0.92624
Uy	1	2	3	4	5	6
H=4	0.99737	1.01166	1.01169	1.00224	1.01042	1.00941
H=8	1.0009	1.00419	1.01032	0.99911	1.005	1.00043
H=12	1.00569	1.00936	1.01499	1.00806	0.99973	1.00191
H=16	1.00601	1.01613	1.00922	1.00803	1.00478	0.99449
H=20	1.0076	1.01204	1.0101	1.00602	0.99965	0.98938
